# Supplementary material
Source: publisher figshare collection journal article supplement (https://springernature.figshare.com/ndownloader/files/31122037)

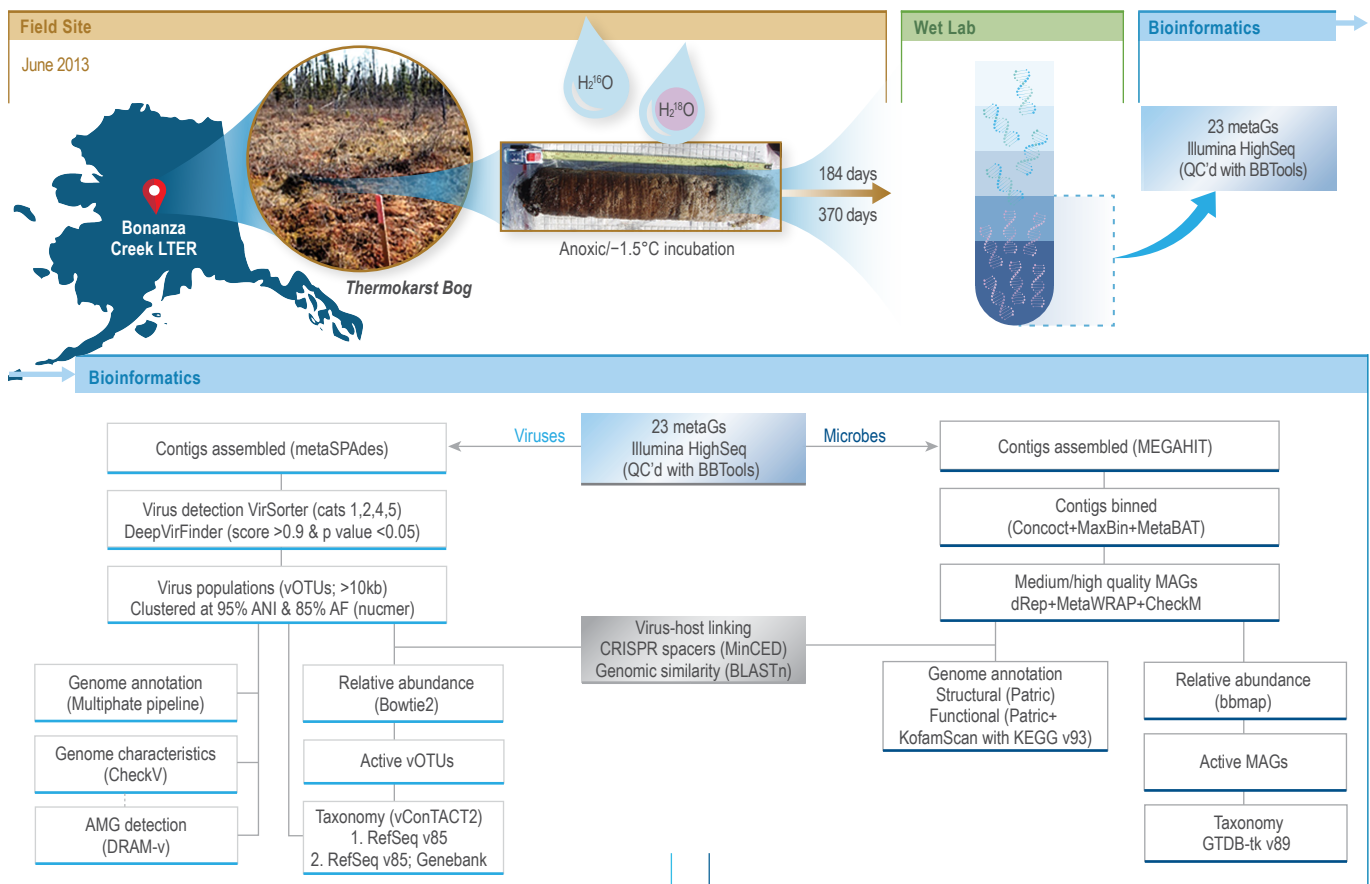

Supplement: Supplementary file 1 [file 31122037]

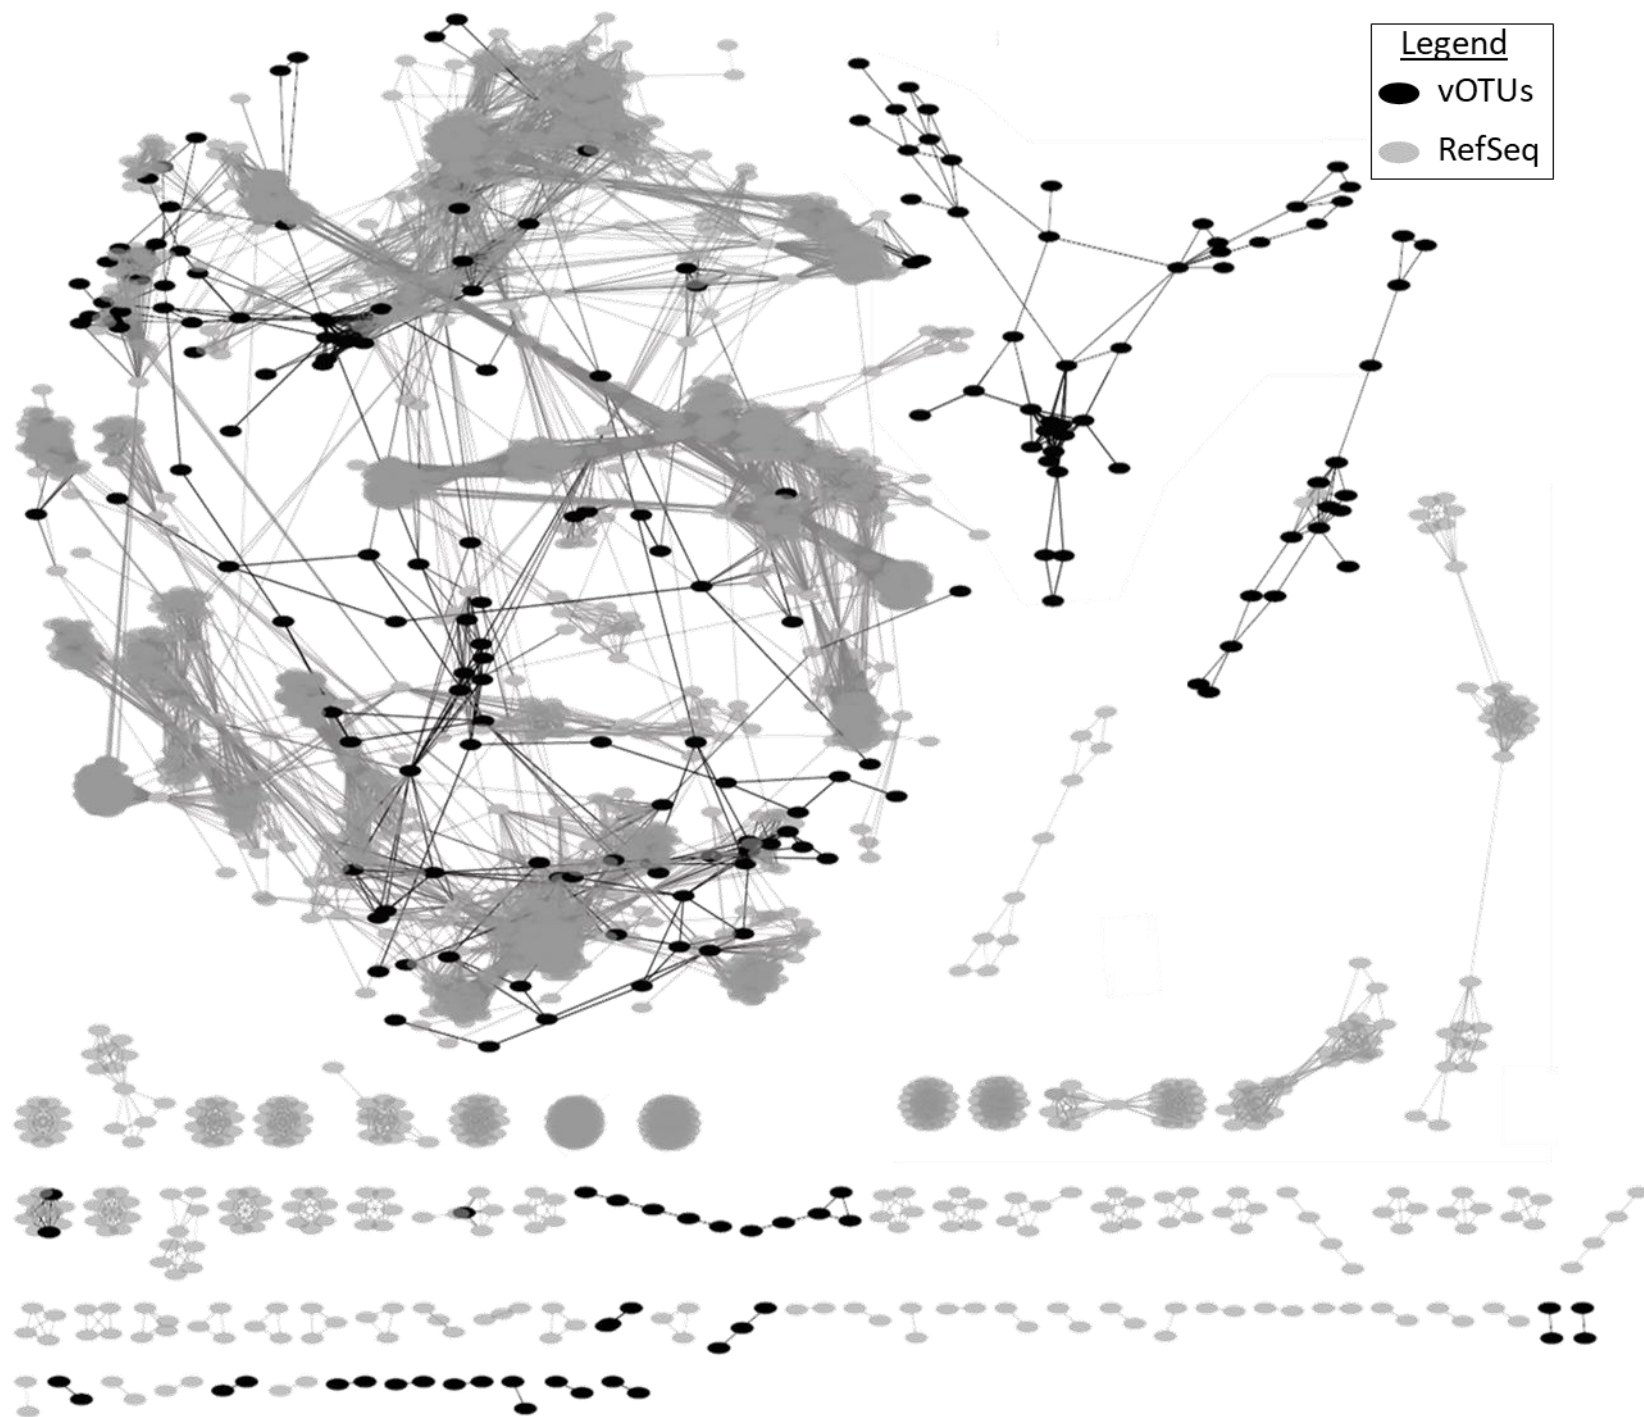

Supplement: Supplementary file 2 [file 31122037]

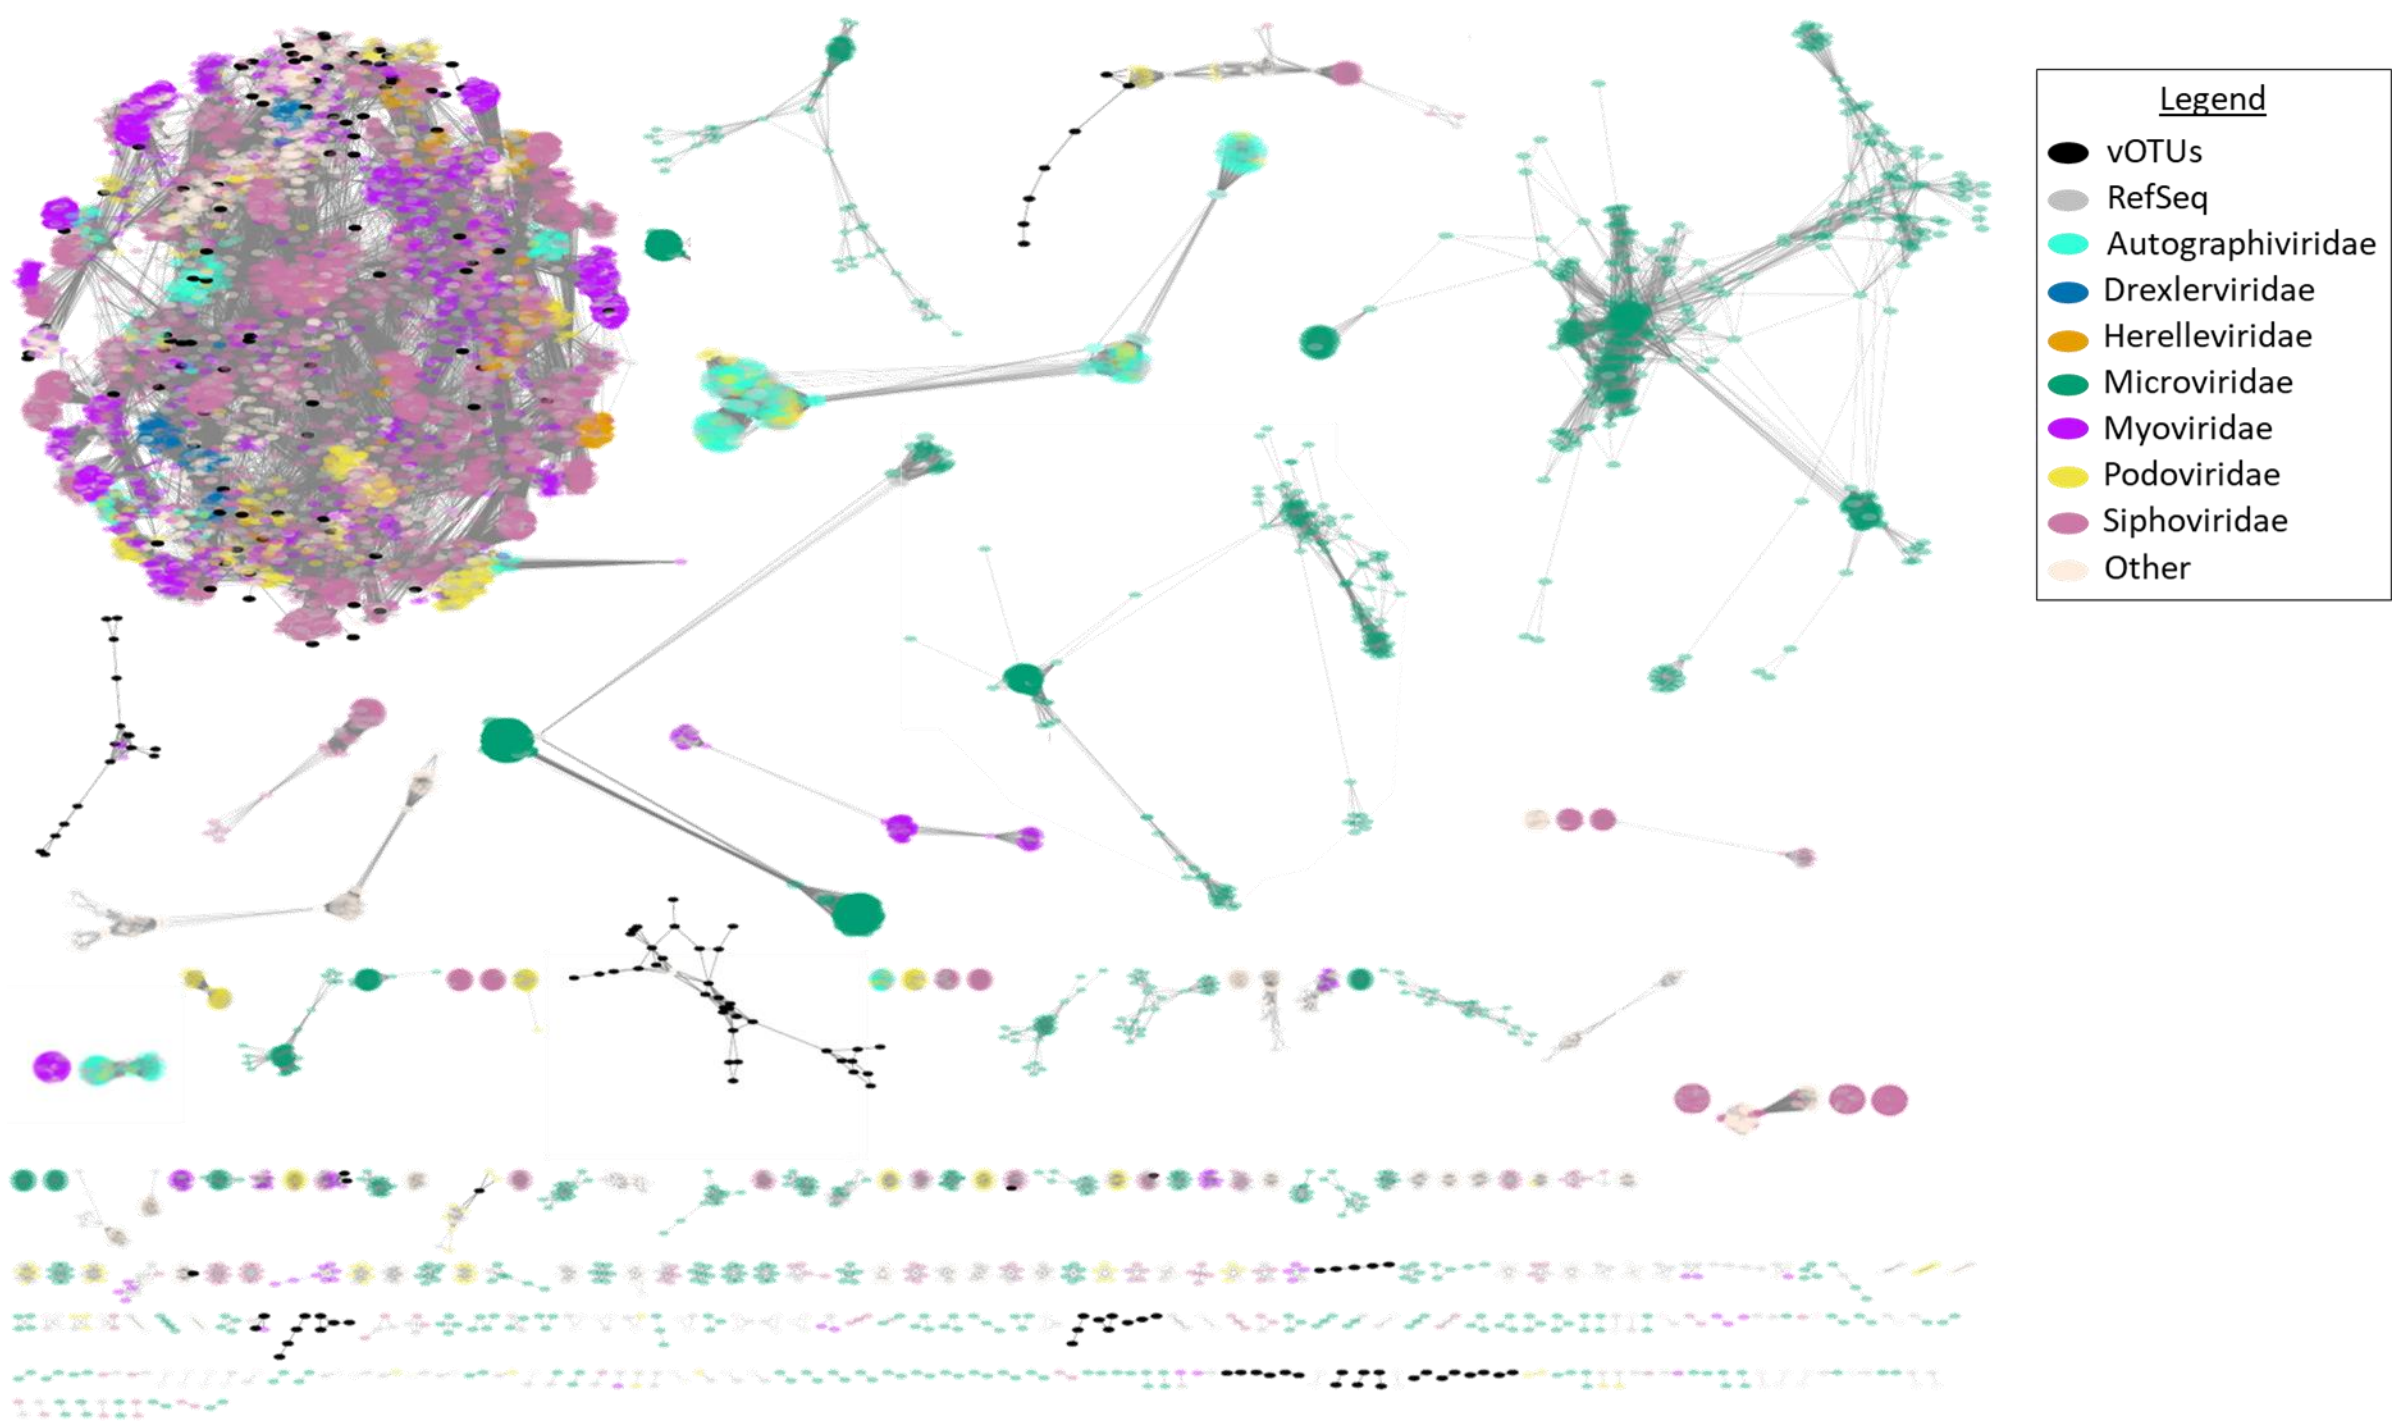

Supplement: Supplementary file 3 [file 31122037]

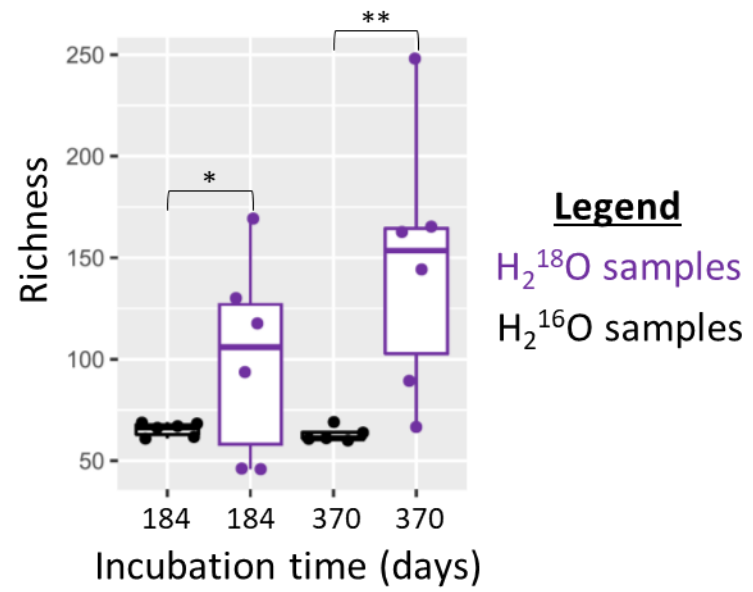

Supplement: Supplementary file 4 [file 31122037]
